# Supplementary material
Source: PubMed Central journal article supplement (PMC5538288)
Supplement: 10.1194_M077305_jlr.M077305-1.pdf [file 10.1194_M077305_jlr.M077305-1.pdf]

### Supplemental material

An allene oxide and 12-oxophytodienoic acid are key intermediates in jasmonic acid biosynthesis by *Fusarium oxysporum*

Ernst H. Oliw and Mats Hamberg

Fig. I

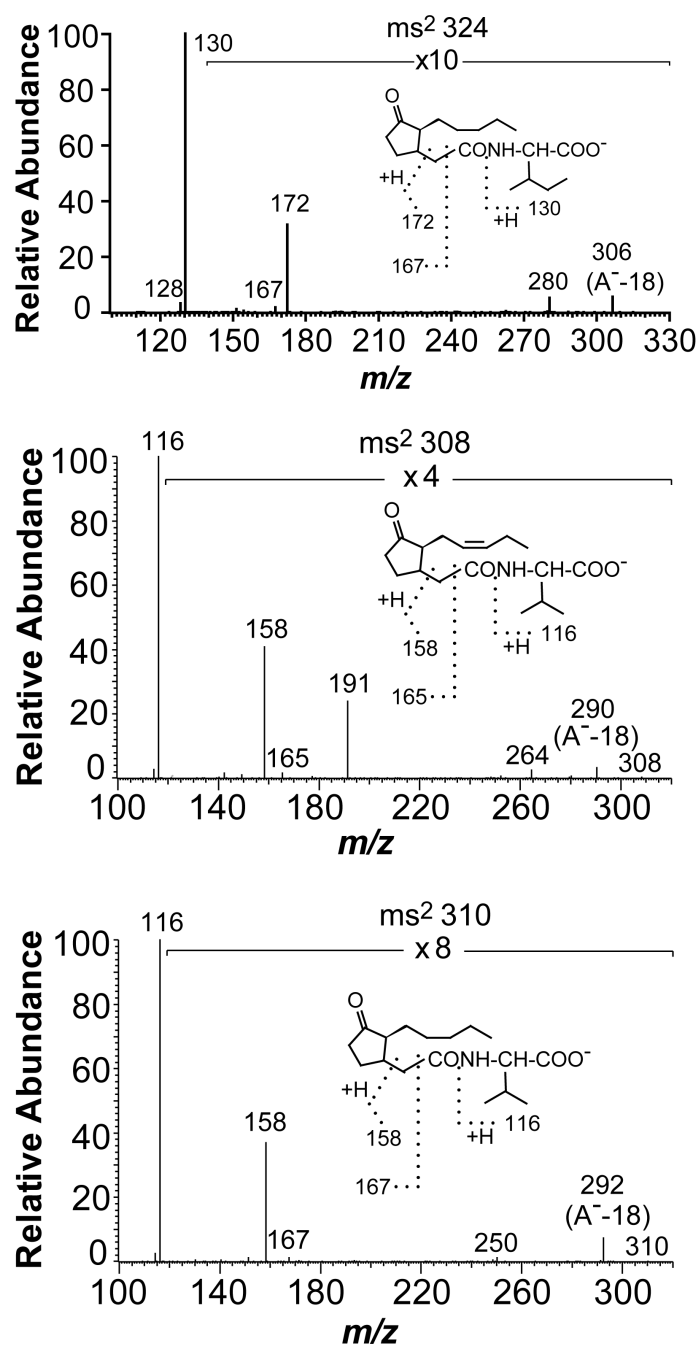

Fig. I. MS<sup>2</sup> spectrum of 9,10-dihydro-JA-Ile, JA-Val, and 9,10-dihydro-JA-Val. The spectra are magnified 10, 4, and 8 times as shown by the inserts.

Fig. II

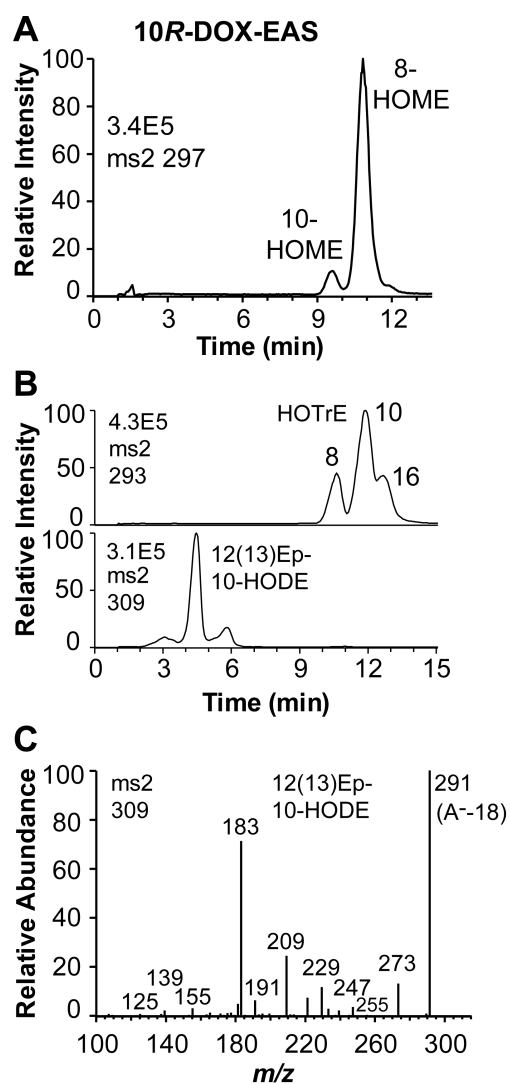

**Fig. II.** Oxidation of 18:1*n*-9 and 18:3*n*-3 by recombinant 10*R*-DOX-EAS of *F. oxysporum*. A. LC-MS analysis of formation of HOME from 18:1*n*-9. 8-HOME was the main product along with small amounts of 10-HOME. B. Chromatograms from LC-MS analysis of products formed from 18:3*n*-3. Top. LC-MS analysis with separation of 8-, 10- and 16-HOPrE (as indicated by the numbers of the peaks). Steric analysis showed that 16-HOPrE was racemic (data not shown). Bottom. MS/MS analysis of formation of epoxy alcohols and dihydroxy metabolites. The main product was 12(13)Ep-10-HODE. C. MS<sup>2</sup> spectrum of 12(13)Ep-10-HODE. See Fig. 5 for formation of major ions.

Fig. III

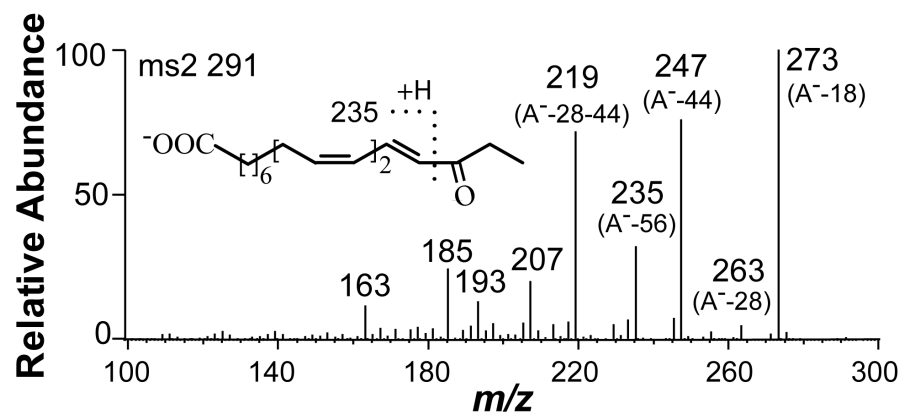

**Fig. III.** MS<sup>2</sup> spectrum ( $m/z$  291--> full scan) of 16-KOTrE. Many fragments are formed by loss of water (A<sup>-</sup> -18), CO (A<sup>-</sup> -28), CO<sub>2</sub> (A<sup>-</sup> -44), and OC=CH-CH<sub>3</sub> (A<sup>-</sup> -56) as indicated by the labels and the insert. Hydrogenation supported the structure. The MS<sup>3</sup> spectrum of 16-HPOTrE ( $m/z$  309-->291-->full scan) was identical to the MS<sup>2</sup> spectrum of 16-KOTrE.

Fig. IV

A

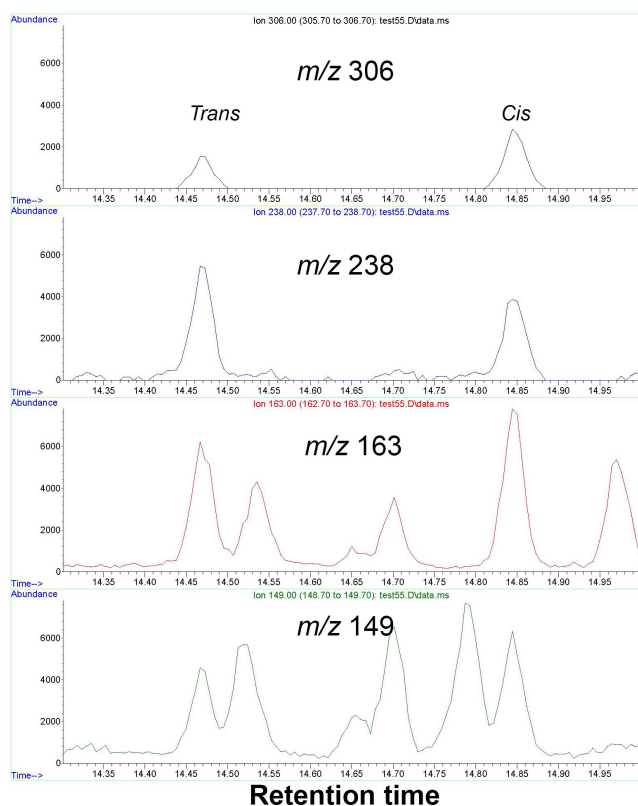

B

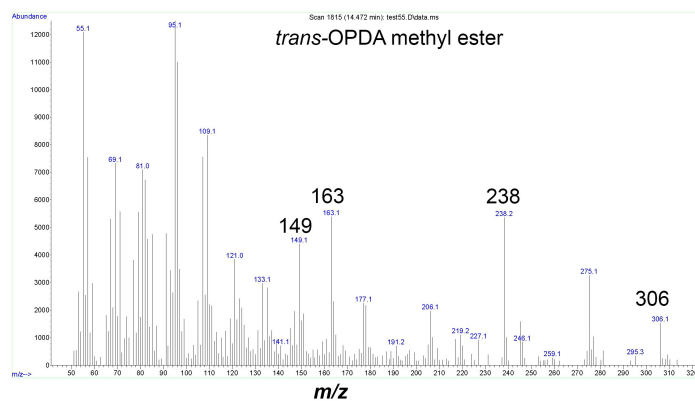

**Fig. IV.** GC-MS analysis of 12-OPDA generated by *F. oxysporum*. A, selected monitoring of mass-spectral ions typical for the methyl esters of 12-OPDA side chain *cis* and *trans* isomers. B, electronic impact mass spectrum recorded at 12.47 min, *i.e.* the methyl ester of *trans*-12-OPDA, showing  $m/z$  306 ( $M^+$ ), 275 ( $M^+ - OCH_3$ ), 238 ( $M^+ - 68$ ; rearrangement followed by loss of  $C_5H_8$ ), 206 ( $238 - CH_3OH$ ), 163, and 149.

Fig. V

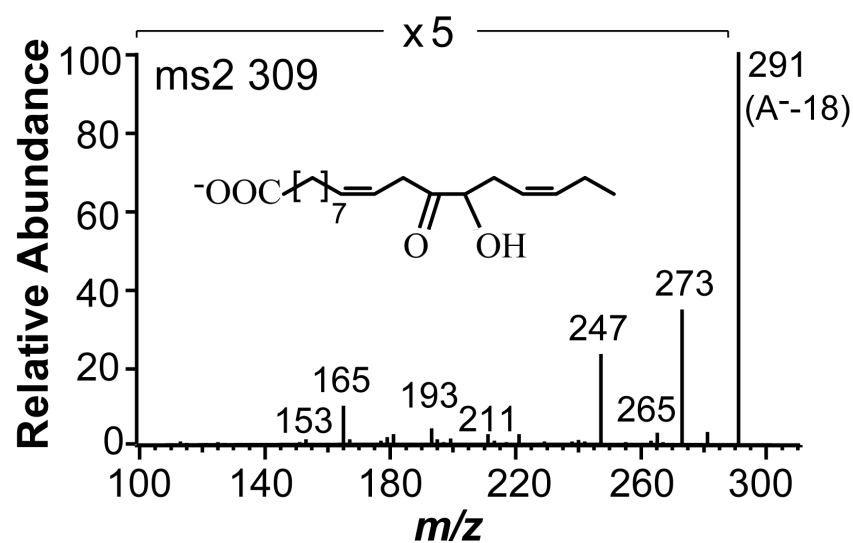

**Fig. V.** MS<sup>2</sup> spectrum of the  $\alpha$ -ketol (12-oxo-13 $R$ -hydroxy-9 $Z$ ,15 $Z$ -octadecadienoic acid). The ions at  $m/z$  291, 273 and 247 dominated the spectrum, whereas the signals at  $m/z$  153 and 165 were much less intense (<2% of the base peak). The spectrum is magnified x5 as shown by the insert.

Fig. VI

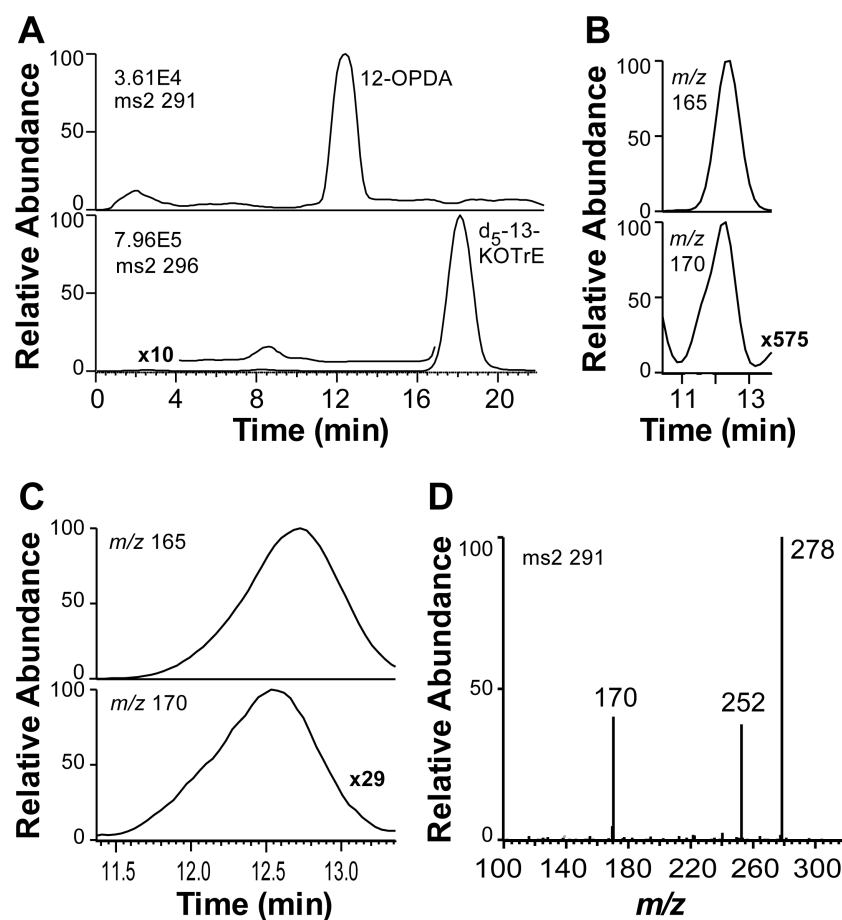

**Fig. VI.** RP-HPLC-MS/MS analysis of endogenous biosynthesis of 12-OPDA and transformation of  $d_5$ -13S-HPOTrE by mycelia of *Fot* in 1 h. A. The top chromatogram shows formation of 12-OPDA from endogenous 18:3 $n$ -3 and the bottom chromatogram shows that 100  $\mu$ M  $d_5$ -13S-HPOTrE is transformed to  $d_5$ -13-KOTrE, but not to significant amounts of  $d_5$ -12-OPDA. B. Selected ion chromatograms show that the signal intensities of  $m/z$  165 are about 575 times stronger than the signal at  $m/z$  170 (possibly due to  $d_5$ -12-OPDA). C and D. Incubation with 1 mM  $d_5$ -13S-HPOTrE increased the biosynthesis to significant amounts of  $d_5$ -12-OPDA as judged from the signal intensity of  $m/z$  170 (C) and the MS<sup>2</sup> spectrum (D).

Fig. VII

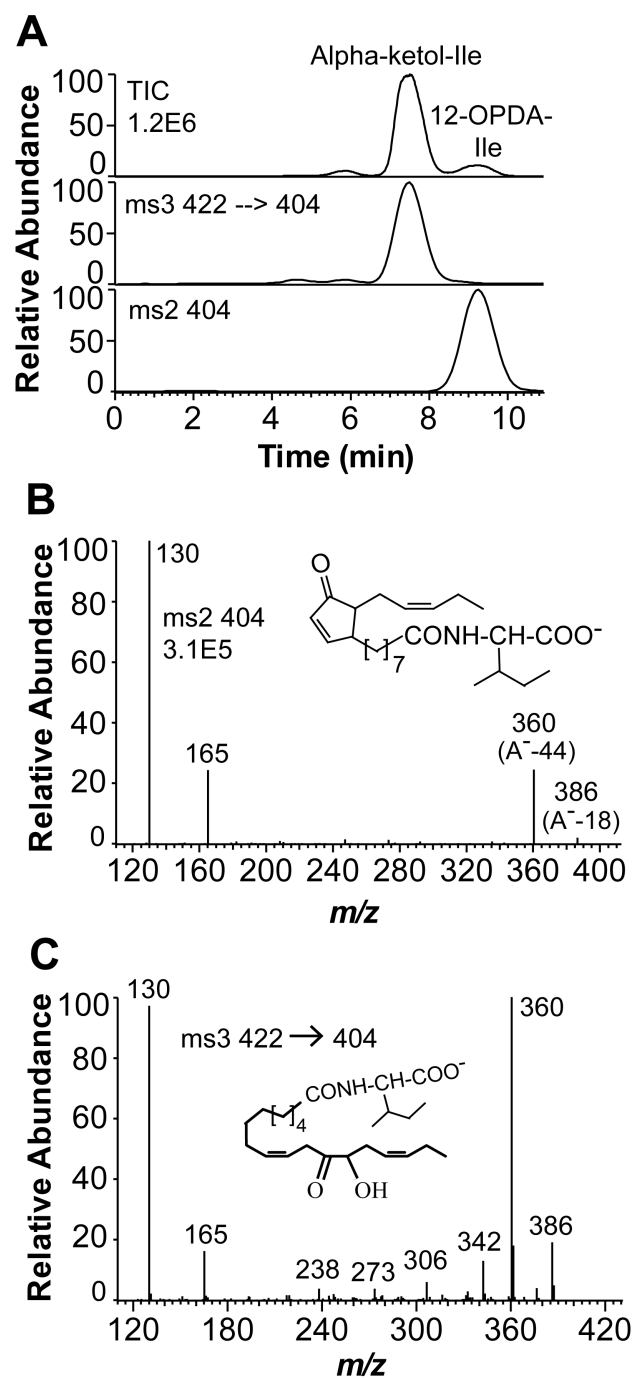

**Fig. VII.** RP-HPLC-MS/MS analysis of the transformation of 13S-HPOTrE-Ile by acetone powder of flaxseed (AOS). A. RP-HPLC-MS/MS analysis of the two major products, which were identified as 12-keto-13-hydroxy-octadecadienoyl-Ile ( $\alpha$ -ketol-Ile; 90%) and 12-OPDA-Ile (10%). TIC, total ion current. The RP-HPLC column was eluted with 70% methanol. B. MS<sup>2</sup> spectrum of 12-OPDA-Ile. C. MS<sup>3</sup> spectrum of  $\alpha$ -ketol-Ile.
